# Supplementary material
Source: PubMed Central journal article supplement (PMC6912081)
Supplement: AEM.02093-19-s0001.pdf [file AEM.02093-19-s0001.pdf]

## 1 Supplementary Material

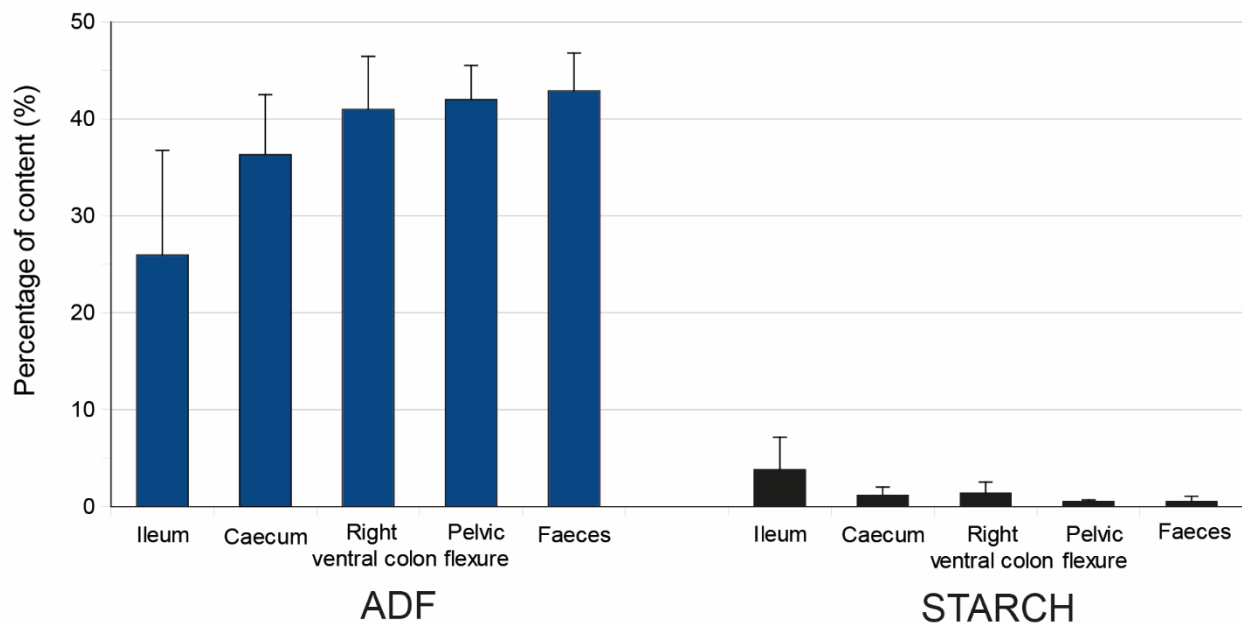

2 **Figure S1:** The average percentage of ADF (acid detergent fiber) and starch within  
3 the gut content from five areas of the equine gastrointestinal system from three horses  
4 (1, 2 and 3 in Table S1). Error bars show standard deviation of the values within each  
5 group.

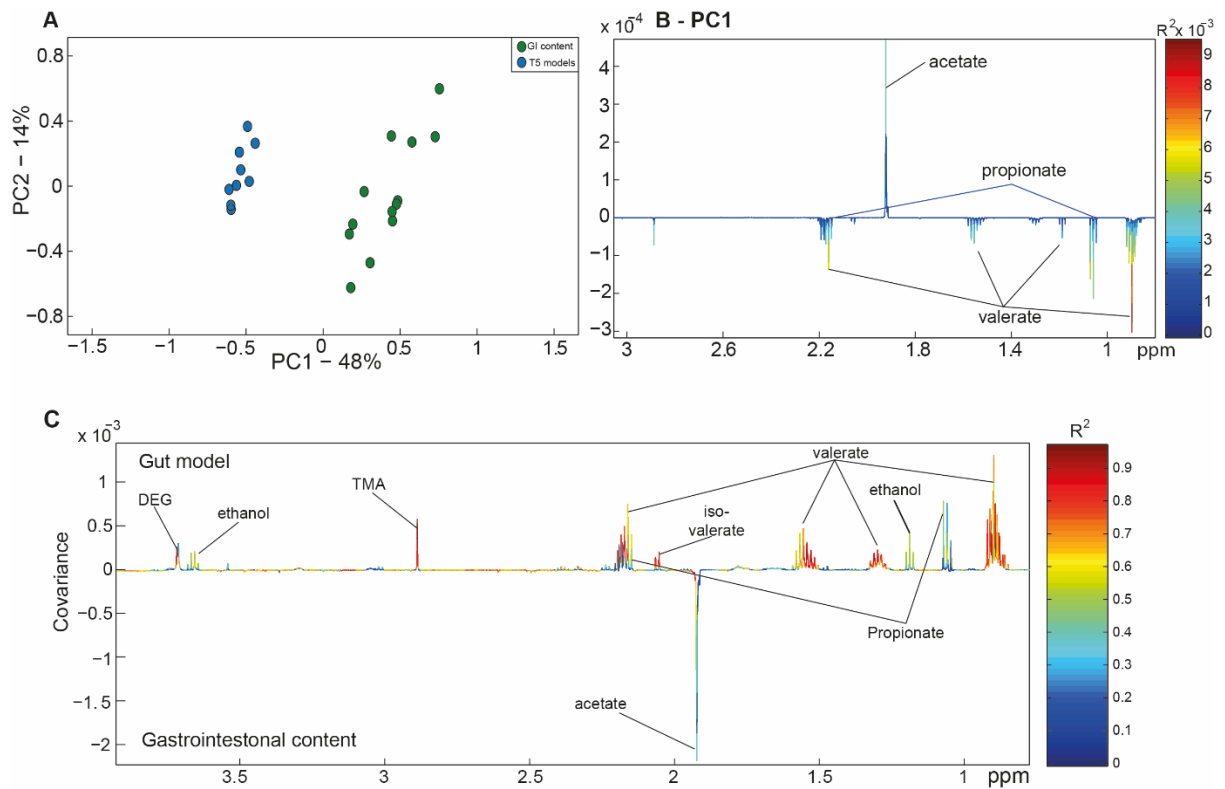

6 **Figure S2:** Comparison of metabolic profiles of ex vivo gut content and the gut model  
7 at steady state (T5). Multivariate models built with the  $^1\text{H}$  NMR spectra from samples  
8 of GI content and samples from all vessels of the three separate gut models in the  
9 concordance study (inoculated with feces from different horses). A PCA model ( $R^2 =$   
10 0.64) was built and A) scores plot and B) the loading plot for PC1 (representing 48 %  
11 of the total variance in the dataset) was visualised. C) The correlation coefficient plot  
12 from the OPLS-DA model built with these spectra ( $Q^2Y = 0.82$ ). PC, principle  
13 component; DEG, diethylene glycol; TMA, trimethylamine.

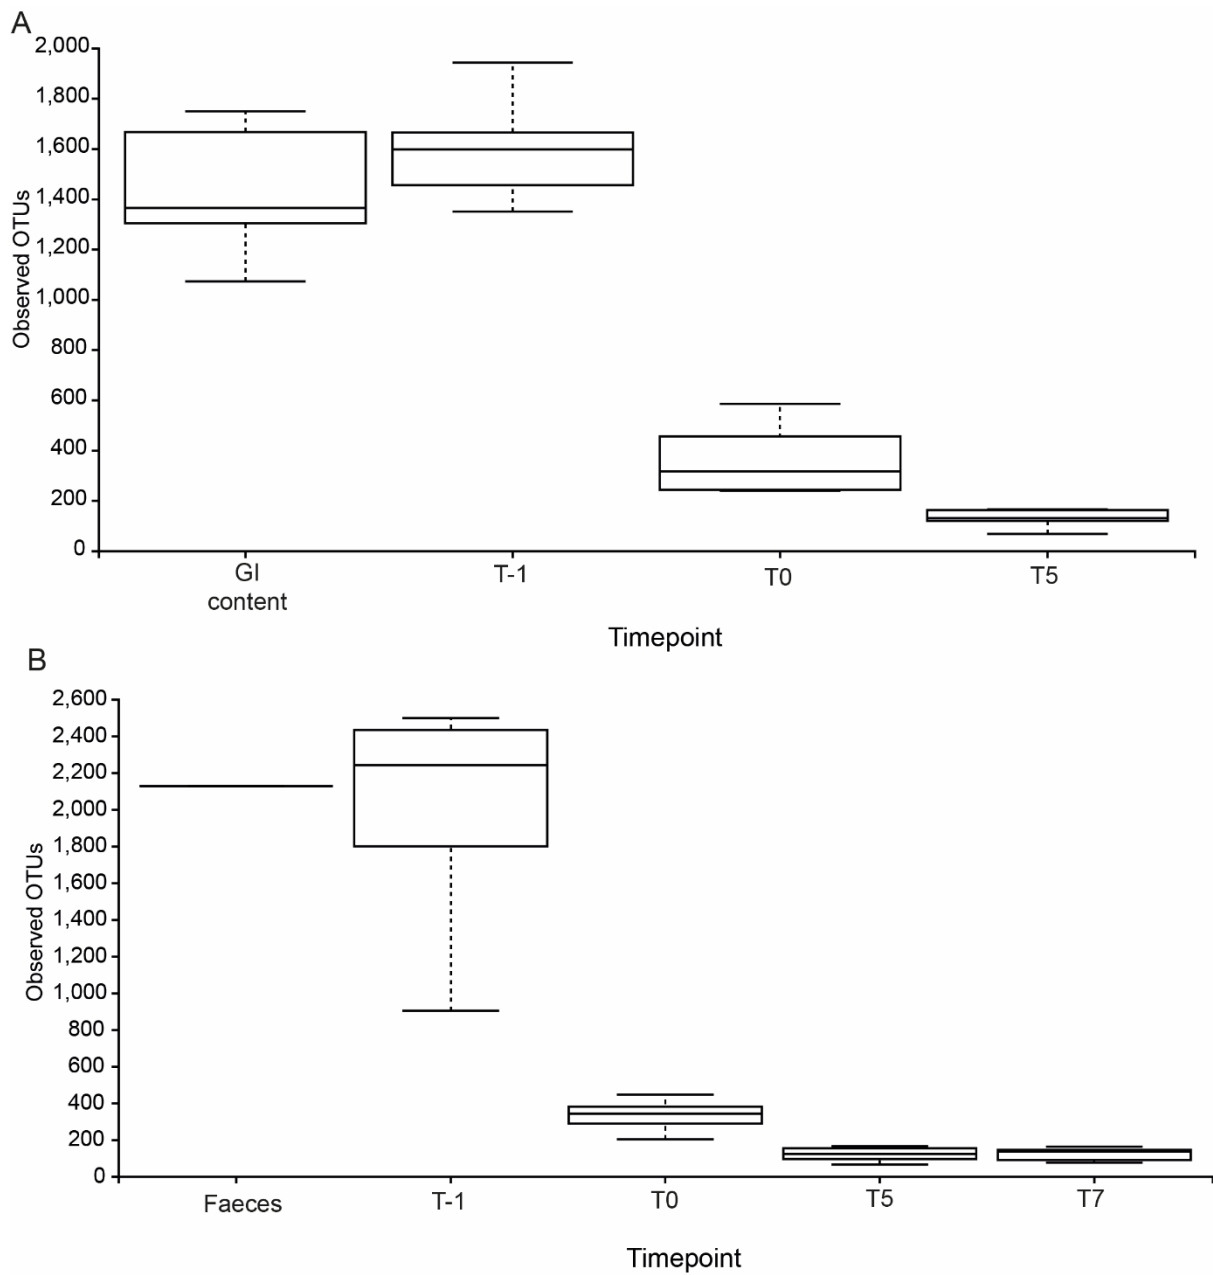

14 **Figure S3:** Alpha rarefaction boxplots showing bacterial diversity of the  
 15 gastrointestinal contents/feces and the time points of the gut models of: A) the  
 16 concordance study and B) the repeatability study.

17

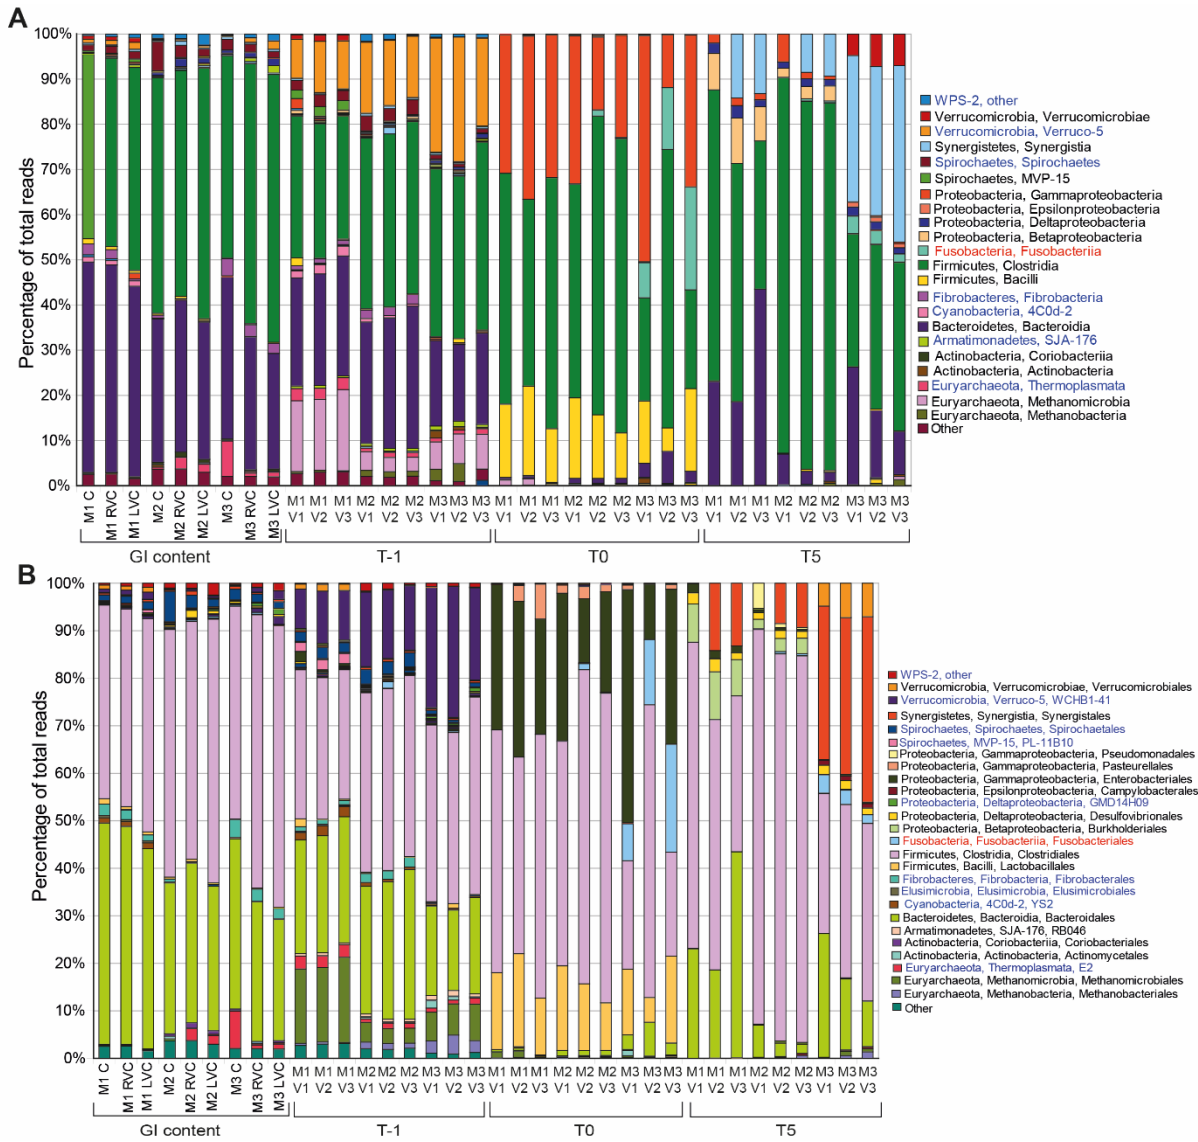

18 **Figure S4:** Relative abundance of bacterial A) classes and B) orders identified in  
 19 samples from the GI content and all vessels the three gut models of the concordance  
 20 study (inoculated with feces from three different horses). The key indicates whether  
 21 bacterial phyla are: identified in both gastrointestinal and gut model samples at T5  
 22 (black), only in gastrointestinal samples (blue) or only in gut model samples (red). C,  
 23 cecum; RVC, right ventral colon; LVC, left ventral colon; V, vessel; T, turnover.

24

25

26

27

28

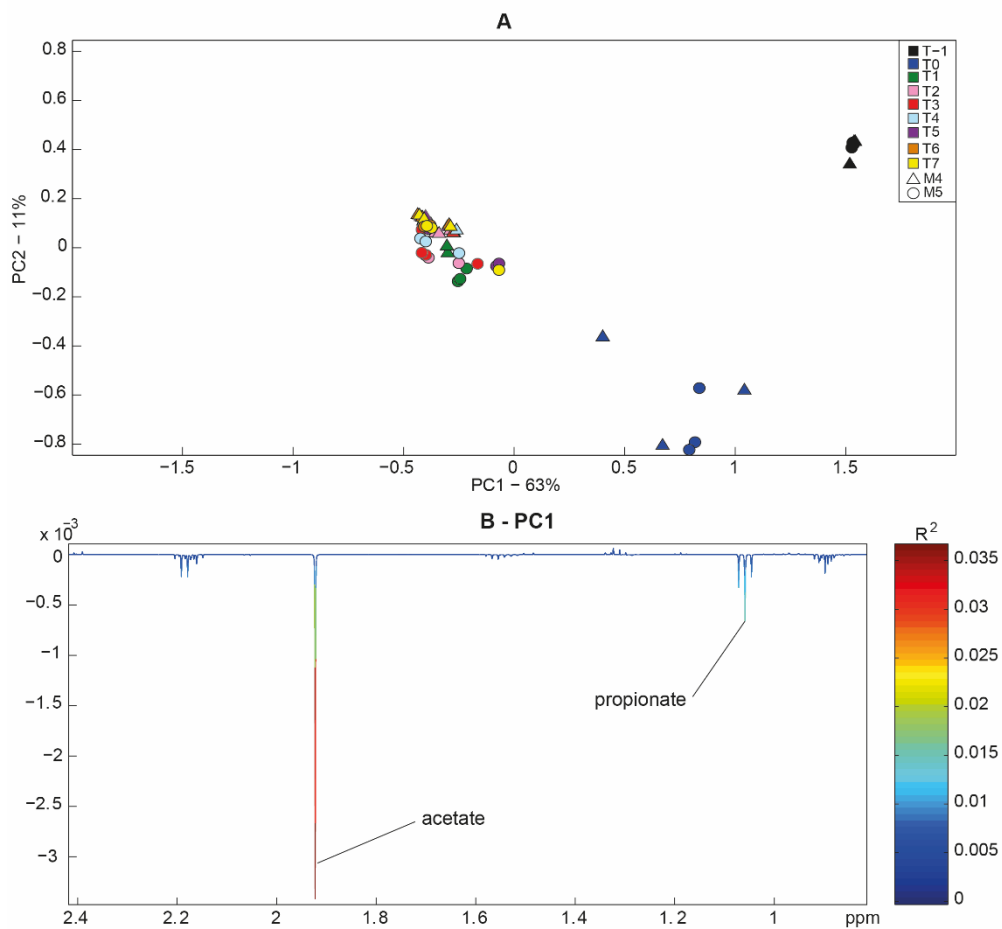

29 **Figure S5:** Demonstration of the repeatability of the metabolic profiles of the gut  
30 models from the repeatability study. PCA model constructed with the  $^1\text{H}$  NMR spectra  
31 gained from the all vessels of the two gut models inoculated with the feces from the  
32 same horse ( $R^2 = 0.75$ ). A) The PCA scores plot for this model and B) the loading plot  
33 for PC1 (representing 63 % of the total variance in the dataset). T, turnover; PC,  
34 principle component; M, model.

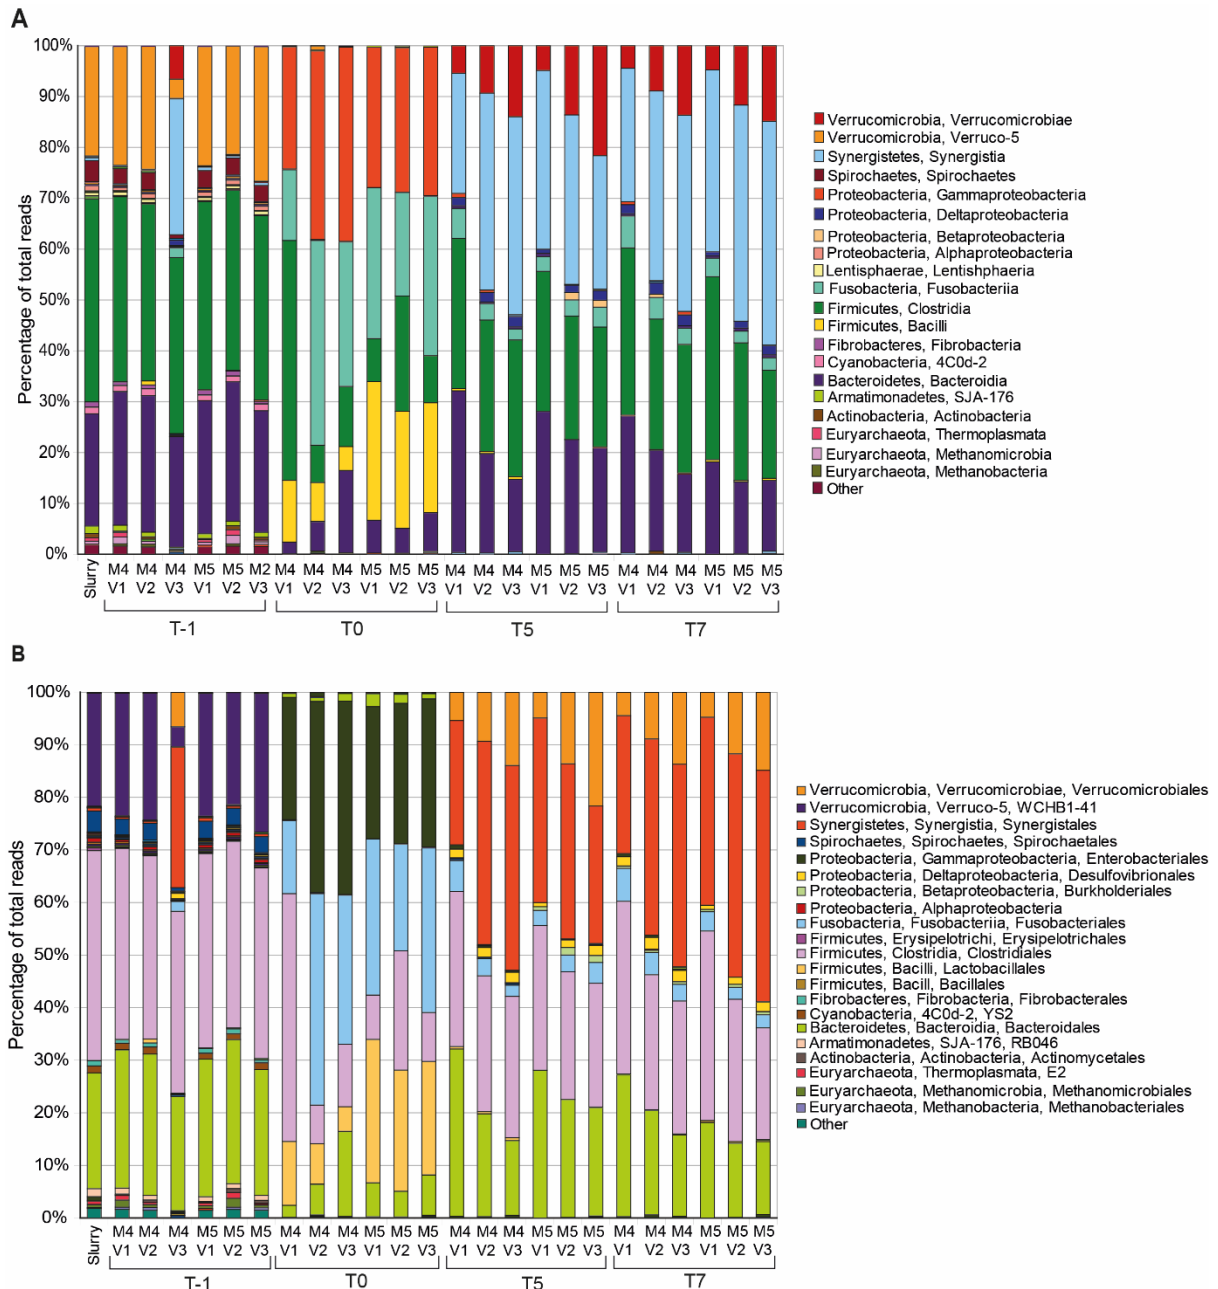

35 **Figure S6:** Relative abundance of bacterial A) classes and B) orders identified in  
 36 samples from all vessels the two gut models of the repeatability study (inoculated with  
 37 feces from the same horse).C, cecum; RVC, right ventral colon; LVC, left ventral colon;  
 38 V, vessel; T, turnover; M model.

39

**Table S1:** Information on horses sampled for gastrointestinal contents *post-mortem* and faeces *pre-mortem*.

| Horse number | GI content taken                                           | Diet                                                  | Age          | Gender  | Breed     | Method of Euthanasia                               | Analysis samples used for       |
|--------------|------------------------------------------------------------|-------------------------------------------------------|--------------|---------|-----------|----------------------------------------------------|---------------------------------|
| Horse 1      | Cecum, right ventral colon, left ventral colon, and faeces | Haylage, readigrass, pasture nuts and at pasture      | 14 years old | Gelding | Warmblood | Somulose injection due to musculoskeletal problems | Fibre and starch analysis       |
| Horse 2      | Cecum, right ventral colon, left ventral colon, and faeces | Hay and at pasture                                    | 18 years old | Gelding | Warmblood | Somulose injection due to chronic lameness         | Fibre and starch analysis       |
| Horse 3      | Cecum, right ventral colon, left ventral colon, and faeces | At pasture                                            | 22 years old | Gelding | Warmblood | Shot due to chronic lameness/laminitis             | Fibre and starch analysis       |
| Horse 4      | Cecum, right ventral colon, left ventral colon, and faeces | At pasture                                            | 18 years old | Gelding | Tb x      | Shot due to persistent lameness                    | Concordance study (M1)          |
| Horse 5      | Cecum, right ventral colon, left ventral colon, and faeces | At pasture                                            | 5 years old  | Gelding | Tb x      | Shot due to behavioural issues                     | Concordance study (M2)          |
| Horse 6      | Cecum, right ventral colon, left ventral colon, and faeces | At pasture                                            | 13 years old | Gelding | Tb x      | Shot with sedation due to persistent lameness      | Concordance study (M3)          |
| Horse 7      | Fresh faeces sampled gut models                            | At pasture and supplemented with alfafa and sugabeet. | 12 years old | Mare    | Paso fino | None – sampled <i>pre-mortem</i>                   | Repeatability study (M4 and M5) |

**Table S2:** R<sup>2</sup> values for the regression models built with the SCFA/BCFA concentrations and counts for the prominent bacterial phyla, as an average of the three concordance study gut models. Where R<sup>2</sup> > 0.5 a p value showing the significance of this relationship is also stated below the R<sup>2</sup> value.

|                              | <b>Acetate</b>                                                          | <b>Propionate</b>                                           | <b>Butyrate</b>                                                         | <b>Valerate</b>                                                         | <b>Isobutyrate</b>                                                      |
|------------------------------|-------------------------------------------------------------------------|-------------------------------------------------------------|-------------------------------------------------------------------------|-------------------------------------------------------------------------|-------------------------------------------------------------------------|
| <b><i>Firmicutes</i></b>     | V1 = 0.98<br>p = 0.09<br>V2 = 0.88<br>p = 0.23<br>V3 = 0.76<br>p = 0.33 | V1 = 0.57<br>p = 0.45<br>V2 = 0.72<br>p = 0.36<br>V3 = 0.26 | V1 = 0.64<br>p = 0.41<br>V2 = 0.13<br>V3 = 0.10                         | V1 = 0.26<br>V2 = 0.04<br>V3 = 0.02                                     | V1 = 0.36<br>V2 = 0.05<br>V3 = 0.02                                     |
| <b><i>Bacteroidetes</i></b>  | V1 = 0.06<br>V2 < 0.01<br>V3 = 0.04                                     | V1 = 0.54<br>p = 0.47<br>V2 = 0.04<br>V3 = 0.44             | V1 = 0.48<br>V2 = 0.59<br>p = 0.44<br>V3 = 0.61<br>p = 0.43             | V1 = 0.84<br>p = 0.26<br>V2 = 0.70<br>p = 0.37<br>V3 = 0.82<br>p = 0.28 | V1 = 0.75<br>p = 0.34<br>V2 = 0.69<br>p = 0.37<br>V3 = 0.82<br>p = 0.28 |
| <b><i>Proteobacteria</i></b> | V1 = 0.34<br>V2 = 0.61<br>p = 0.43<br>V3 = 0.39                         | V1 < 0.01<br>V2 = 0.41<br>V3 = 0.02                         | V1 = 0.01<br>V2 < 0.01<br>V3 < 0.01                                     | V1 = 0.07<br>V2 = 0.01<br>V3 = 0.07                                     | V1 = 0.03<br>V2 < 0.01<br>V3 = 0.06                                     |
| <b><i>Fusobacteria</i></b>   | V1 = 0.99<br>p < 0.01<br>V2 = 0.37<br>V3 = 0.21                         | V1 = 0.70<br>p = 0.37<br>V2 = 0.19<br>V3 < 0.01             | V1 = 0.76<br>p = 0.33<br>V2 = 0.05<br>V3 = 0.04                         | V1 = 0.38<br>V2 = 0.11<br>V3 = 0.19                                     | V1 = 0.49<br>V2 = 0.10<br>V3 = 0.18                                     |
| <b><i>Synechistetes</i></b>  | V1 = 0.47<br>V2 = 0.29<br>V3 = 0.34                                     | V1 = 0.94<br>p = 0.16<br>V2 = 0.49<br>V3 = 0.83<br>p = 0.27 | V1 = 0.90<br>p = 0.20<br>V2 = 0.99<br>p = 0.08<br>V3 = 0.94<br>p = 0.16 | V1 = 0.99<br>p = 0.05<br>V2 = 0.99<br>p < 0.01<br>V3 = 0.99<br>p < 0.01 | V1 = 0.99<br>p = 0.02<br>V2 = 0.99<br>p = 0.11<br>V3 = 0.99<br>p = 0.01 |
